# Supplementary material for: Effect of circadian rhythm disruption on benign prostatic hyperplasia in rats
Source: PeerJ. 2025 Oct 15;13:e20173. doi: 10.7717/peerj.20173 (PMC12535237; doi:10.7717/peerj.20173)
Supplement: Supplemental Information 1 [file peerj-13-20173-s001.xlsx]

## Sheet: T+E2 and T+E2+Cle
	Initial body weight(g)	Final body weight(g)	Prostate Weight(g)	Relative Prostatic index(%)
T+E2-1	359	277	1.83	0.66
T+E2-2	341	266	1.24	0.47
T+E2-3	349	450	1.26	0.28
T+E2-4	367	458	1.17	0.25
T+E2-5	363	465	1.45	0.3
T+E2+Cle-1	347	351	2.66	0.76
T+E2+Cle-2	342	363	2.26	0.62
T+E2+Cle-3	350	377	2.47	0.65
T+E2+Cle-4	366	445	2.16	0.49
T+E2+Cle-5	360	458	1.22	0.27

## Sheet: Con and Cle
	Initial body weight(g)	Final body weight(g)	Prostate Weight(g)	Relative Prostatic index(%)
Con1	378	644	2.25	0.35
Con2	362	596	1.82	0.305
Con3	363	458	1.18	0.257
Con4	356.5	598	1.69	0.2826
Con5	368	523	1.19	0.2275
Cle1	367.5	527	2.06	0.391
Cle2	375.5	567	2.11	0.372
Cle3	360	607	1.81	0.298
Cle4	350	598	2.17	0.363
Cle5	353	582	1.89	0.325
