# Supplementary material for: Effect of circadian rhythm disruption on benign prostatic hyperplasia in rats
Source: PeerJ. 2025 Oct 15;13:e20173. doi: 10.7717/peerj.20173 (PMC12535237; doi:10.7717/peerj.20173)
Supplement: Supplemental Information 3 [file peerj-13-20173-s003.xlsx]

## Sheet: T+E2 and T+E2+Cle
	Area	Mean	Min	Max	Angle	IntDen	RawIntDen	Length
T+E2-1	8.25	212.78	198.17	227.95	69.86	1755.46	7021.84	15.98
T+E2-1	7.75	213.36	195.85	238.13	70.35	1653.51	6614.03	14.87
T+E2-1	11.25	211.27	163.76	229.33	31.18	2376.81	9507.24	22.21
T+E2-2	9.75	209.59	168.26	251.69	-91.51	2043.33	8174.15	19.01
T+E2-2	10.25	208.44	178.92	233.01	-63.43	2136.25	8545.85	20.12
T+E2-2	11	195.79	162.17	230.64	-6.63	2153.52	8614.92	21.64
T+E2-3	10.25	214.02	184.59	229.69	36.87	2193.51	8774.93	20
T+E2-3	7.5	220.03	207.91	233.05	-35.31	1650.04	6600.81	14.7
T+E2-3	10.25	211.21	177	232	-17.53	2164.66	8659.5	19.92
T+E2+Cle-1	9.61	215.76	200.67	233.32	68.75	2073.86	8630.58	18.93
T+E2+Cle-1	9.61	209.93	195.37	229.3	55.49	2017.82	8397.36	19.04
T+E2+Cle-1	13.94	216.79	177.24	247.14	-65.22	3021.35	12573.6	28.07
T+E2+Cle-2	12.01	215.79	197.67	232.25	-9.46	2592.62	10789.4	23.85
T+E2+Cle-2	14.18	210.47	174.03	232.68	63.43	2983.95	12418	28.5
T+E2+Cle-2	15.86	215.24	202.9	235.03	-8	3413.47	14205.5	31.68
T+E2+Cle-3	16.58	209.38	160.97	246.67	-1.68	3471.51	14447	33.35
T+E2+Cle-3	15.62	214.22	200.73	233.33	-86.42	3345.91	13924.4	31.43
T+E2+Cle-3	13.94	209.17	173.92	226.71	32.01	2915.2	12131.9	27.75

## Sheet: Con and Cle
	Area	Mean	Min	Max	Angle	IntDen	RawIntDen	Length
Con1	12.59	165.17	150.57	184.2	53.97	2078.86	2477.49	12.46
Con1	15.1	141.15	112.65	181.67	59.04	2131.88	2540.67	16.02
Con1	7.55	142.67	121.17	172.67	-97.13	1077.44	1284.04	7.39
Con2	10.91	155.9	131	215.67	-48.37	1700.58	2026.67	11.03
Con2	9.23	151.55	76.33	201.5	43.03	1398.85	1667.08	9.4
Con2	10.91	168.54	154.41	191.67	-45	1838.54	2191.08	11.01
Con3	10.07	176.5	141.02	224.23	-40.24	1777.18	2117.96	10.4
Con3	9.23	189.46	174.7	212.17	-51.63	1748.75	2084.08	9.35
Con3	9.23	194.09	184.55	203.08	-27.41	1791.49	2135.01	9.29
Cle1	18.46	182.25	118.21	203.67	-58.57	3364.32	4009.44	19.32
Cle1	15.1	182.04	153.79	201.33	-69.44	2749.5	3276.72	15.65
Cle1	10.07	205.6	177.9	234.13	-68.2	2070.21	2467.18	9.87
Cle2	9.23	181.43	152.2	205.67	60.75	1674.61	1995.72	8.75
Cle2	10.91	179.07	123.62	218.64	-35.73	1953.38	2327.95	10.72
Cle2	10.07	179	129	202.05	-41.42	1802.38	2147.99	10.38
Cle3	10.07	162.54	128.76	176.67	37.87	1636.66	1950.49	10.44
Cle3	12.59	131.8	86.69	193.67	39.29	1658.9	1977	13.02
Cle3	15.94	151.91	97.93	176.82	-122.83	2421.93	2886.34	16.9

## Sheet: Ki67 positive rate(%)
Slice	Count	Total Area	Average Size	%Area	Mean	IntDen
Con-1.jpg-(Colour_2)	48	8043	167.562	0.352	255	42728.4
Con-1.jpg-(Colour_1)	881	125015	141.901	5.478	255	36184.8
Con-2.jpg-(Colour_2)	38	11772	309.789	0.516	255	78996.3
Con-2.jpg-(Colour_1)	679	98862	145.599	4.332	255	37127.8
Con-3.jpg-(Colour_2)	93	25963	279.172	1.138	51.574	13226.9
Con-3.jpg-(Colour_1)	496	232317	468.381	10.18	228.837	107848
Cle-1.jpg-(Colour_2)	327	137827	421.489	6.039	0	0
Cle-1.jpg-(Colour_1)	834	291020	348.945	12.752	225.962	79216.2
Cle-2.jpg-(Colour_2)	458	136705	298.483	5.99	118.404	35294.9
Cle-2.jpg-(Colour_1)	1169	292810	250.479	12.83	223.499	56305.1
Cle-3.jpg-(Colour_2)	342	92426	270.251	4.05	61.698	17094.4
Cle-3.jpg-(Colour_1)	817	346072	423.589	15.164	230.336	97545.6
