# Supplementary material for: Effect of circadian rhythm disruption on benign prostatic hyperplasia in rats
Source: PeerJ. 2025 Oct 15;13:e20173. doi: 10.7717/peerj.20173 (PMC12535237; doi:10.7717/peerj.20173)
Supplement: Supplemental Information 5 [file peerj-13-20173-s005.xlsx]

## Sheet: Sheet1
Sample Name	CT value of target gene	CT value of internal reference GADPH	Sample Name	CT value of target gene	CT value of internal reference GADPH
control group	17.78	16.81	control group	18.785	17.875
	16.37	18.035		17.215	18.32
	17.64	16.815		18.825	18.295
Kif2ta	30.165	27.19	Irf8	35.12	27.83
	27.735	28.015		28.16	26.1
	28.68	26.485		30.57	22.095
Cep55	31.245	27.165	Jchain	23.4	21.435
	27.095	27.61		23.915	22.76
	27.37	26.09		25.415	20.46
Espl1	28.995	27.31	Pou2af1	31.06	29.34
	28.245	28.245		31.3	29.75
	28.8	26.065		33.15	27.585
Mzb1	27.14	25.4	Prc1	28.775	26.395
	28.045	27.41		27.04	26.515
	29.76	23.345		28.275	26.235
